# Supplementary material
Source: publisher site journal article supplement (https://www.dovepress.com/article/477615)
Supplement: Supplementary file 1 [file get_supplementary_file.php]

Supplementary Table 1. Analysis of literature

| **Authors** | Design | Definition | Defining attributes | Antecedents | Consequences | Empirical referents |
| --- | --- | --- | --- | --- | --- | --- |
| Panjabi et al., 2013 [34] | Historical review  (N= 16,290) | persistence with triple therapy, treatment modification and access to all three agents in their antihypertensive regimen over the follow-up duration correctly | Ability to comply the treatment  Consistency on the treatment plan | Multiple medicines | Improving health | Keeping scheduled appointments  Measures of treatment outcomes |
| Afonso et al., 2014 [40] | Quantitative  (N= 881) | following antipsychotic continuation and their medication as prescribed | Consistency on the treatment plan | Long-term medication | Success of treatment, improving health | Self-report measures  Measures of treatment outcomes |
| McCullough et al., 2014 [41] | Quantitative  (N= 75) | Follow the prescription of physical activity, diet, use of medication, blood glucose monitoring, foot care, and smoking | Ability to comply the treatment  Consistency on the treatment plan | Life-long medication, self-care | Improving the quality of life | Self-report measures |
| Ramsey et al., 2014 [27] | Literature review | Coincides with medical or health advice, taking medicine on time, attend appointments | Ability to comply the treatment | Daily medication, behavioral lifestyles changing | Improving the management of chronic conditions | Medication adherence |
| Hood et al., 2016 [31] | Literature review | Regular attendance at follow up appointments with doctors (appointment keeping), enough mental preparation to following long-term stringent dietary, exercise, and vitamin use. | Communication with healthcare provider Ability to comply the treatment  Consistency on the treatment plan  Willingness to treatment | long-term diet and lifestyle changing, conflicting operational definitions of adherence | Positive outcome after bariatric surgery | Keeping scheduled appointments  Self-report measures  Dietary adherence |
| Inzaule et al., 2016 [42] | Qualitative  (N=57) | Persist with therapy, taking Medications as prescribed，regular attendance at follow up appointments | Ability to comply the treatment  Communication with healthcare provider | Life-long medication, change in perception towards the disease, laxity to medication restrictions, stigma | Success of treatment，sustained viral suppression, improving health | Keeping scheduled appointments |
| Sidorkiewicz et al., 2016 [26] | Quantitative  (N=243) | Defined as the extent to which a person’s behavior to coincide with medical advice and drug regimens | Ability to comply the treatment | Long-term medication | Improve long-term treatment, improving health | Self-report measures |
| Adisa et al., 2018 [37] | Quantitative  (N= 605) | Taking medications as prescribed, appointment keeping | Ability to comply the treatment  Communication with healthcare provider | Long-term medication, lifestyle changes | Well controlled hypertensive | Self-report measures  Keeping scheduled appointments |
| Marinho et al., 2018 [30] | Quantitative  (N= 476) | Follow the prescription of diet, exercise, and medications | Consistency on the treatment plan | Perform self-care activities, short- and long-term medicine | Improve self-care ability, improving health | Self-report measures  Measures of treatment outcomes |
| Eicher et al., 2019 [47] | Literature review | Follows the medical regime, taking medications as prescribed, correct administration and continuation of a prescribed treatment | Ability to comply the treatment  Consistency on the treatment plan | Patient characteristics and beliefs, treatment efficacy, duration, administration routes, disease chronicity | Improve the outcome of medical care | Review of medical records  Drug level assays  Medication Event Monitoring Systems |
| Lopez-Campos et al., 2019 [29] | Literature review | Taking medication as prescribed, keeping a diet, executing lifestyle changes as prescribed. Accept the treatment voluntary | Ability to comply the treatment  Consistency on the treatment plan Willingness to treatment | Long-term treatment | Improve long-term treatment | Percent of the total doses of medication taken  Evaluation of administrative databases |
| Pan et al., 2019 [35] | Quantitative  (N= 488) | Defined as the process by which patients follow the agreed treatment regimens with their physician | Consistency on the treatment plan | Long-term treatment | Improve long-term treatment | Self-report measures  Measures of treatment outcomes |
| Xue et al., 2019 [48] | Quantitative  (N= 2,362) | Able to take medication as prescribed, following a diet, executing lifestyle changes as prescribed | Ability to comply the treatment  Consistency on the treatment plan | Long-term treatment | Improve clinical outcomes, success of treatment, improving health | Self-report measures  Measures of treatment outcomes |
| Shakya et al., 2020 [38] | Quantitative  (N= 204) | Individuals seek to understand their illness and accept whether it can be cured or controlled and able to take medication as prescribed, appointment keeping, reduce salt intake for long-term | Self-efficacy  Ability to comply the treatment  Consistency on the treatment plan  Communication with healthcare provider | Illness perceptions and beliefs about medicine | Prevent complications of hypertension | Self-report measures  Keeping scheduled appointments |
| Kaplan & Price, 2020 [28] | Literature review | The extent to which a person’s behavior – taking medication, following a diet, and/or executing lifestyle changes, corresponds with agreed recommendations from a health care provider | Ability to comply the treatment  Consistency on the treatment plan | Deny of diagnosis, lack of disease awareness, lack of trust in HCPs, medication fears, stigma, affordability and access to therapy | Achieve good symptom control | N/A |
| Dibaba et al., 2021 [36] | Quantitative  (N= 445) | Defined as the extent to which patients use their medications according to medical recommendations and practices their appointment schedule every six months’ interval | Ability to comply the treatment  Communication with healthcare provider | Satisfaction status, disclosure status, type of memory aid used, distance from the care facility | Prevent premature morbidity and mortality | Self-report measures  Keeping scheduled appointments |
| Rivera et al., 2022 [39] | Qualitative  (N= 32) | Well understood how and to what extent they need to follow the treatment regimes and then truly accept the treatment | Willingness to treatment, Health literacy | Poor health literacy | Success of treatment | Self-report measures |
